# Supplementary material for: Profiling lysophosphatidic acid levels in plasma from head and neck cancer patients
Source: PeerJ. 2020 Jun 5;8:e9304. doi: 10.7717/peerj.9304 (PMC7278886; doi:10.7717/peerj.9304)
Supplement: Data S1 [file peerj-08-9304-s002.xlsx]

## Sheet: NPC_data_for_R
sample_ID	sample_type	age	gender	L14-00	L16-00	L18-00	L18-01	L18-02	L20-04
2B	CONTROL	81	M	136	13100	7560	7830	12300	3330
3B	CONTROL	58	F	1300	10000	5310	5470	9320	2070
4B	CONTROL	47	F	962	16300	10500	10400	17100	5720
6B	CONTROL	44	M	110	12100	8160	7370	14800	2940
7B	CONTROL	43	M	746	12800	6530	7800	11800	3500
8B	CONTROL	41	M	120	18200	10400	9340	16500	3910
9B	CONTROL	46	F	86.6	11600	4720	7600	10800	3110
10B	CONTROL	44	M	93.5	11900	8550	7680	14300	3880
11B	CONTROL	48	M	101	9040	5280	5880	7290	3030
12B	CONTROL	48	M	367	11800	7070	8880	15700	4710
13B	CONTROL	64	M	656	12400	6540	8320	15100	3800
14B	CONTROL	41	M	93.4	11100	5930	7050	10400	3910
15B	CONTROL	69	M	1750	10200	6320	7300	12800	3430
16B	CONTROL	45	M	113	11900	6040	6740	8530	3930
17B	CONTROL	56	M	90.8	8990	4870	5470	8510	2660
18B	CONTROL	60	M	122	13700	7320	6950	11700	3040
19B	CONTROL	53	M	250	14900	8010	12800	16300	5050
20B	CONTROL	53	M	88.7	7050	4840	5270	7090	2310
21B	CONTROL	46	M	1680	11100	5370	8280	15200	4140
22B	CONTROL	65	M	78.1	8350	6320	5430	9180	3640
23B	CONTROL	56	M	75	9790	4840	7040	10900	2790
24B	CONTROL	59	M	86.6	11800	7260	6890	12200	3470
25B	CONTROL	45	M	436	11300	6040	7630	9440	3710
26B	CONTROL	43	M	988	6240	3820	4410	8530	2710
27B	CONTROL	61	M	691	8910	5230	8760	19900	3080
28B	CONTROL	41	F	187	12600	7540	7720	11100	4510
29B	CONTROL	59	M	456	11200	4440	6410	10700	3280
30B	CONTROL	45	M	303	10200	5710	5980	10400	3150
31B	CONTROL	56	M	431	11000	5670	7690	12600	3260
32B	CONTROL	63	M	764	8410	4160	5810	9650	3000
33B	CONTROL	36	M	85.2	12300	7600	10400	21600	4720
34B	CONTROL	49	M	396	7230	4010	5030	7080	3200
35B	CONTROL	71	M	118	11800	5890	7130	8800	3950
36B	CONTROL	58	M	560	11500	6000	8530	17700	4000
37B	CONTROL	73	M	261	7360	4740	4260	8940	2290
38B	CONTROL	39	M	224	8340	5300	6560	9130	2740
39B	CONTROL	46	M	305	11100	6050	9230	17500	4220
42B	CONTROL	46	M	851	9040	6800	8030	17800	4670
C663	CONTROL	59	M	227	4100	2260	2280	4510	740
C664	CONTROL	57	F	53	4920	3340	3340	7570	1450
C665	CONTROL	24	M	99.2	3990	2220	3590	7630	1650
C669	CONTROL	63	M	60.8	3810	2380	3040	5710	1550
C670	CONTROL	48	M	94.5	2880	1540	1490	3220	719
C673	CONTROL	60	M	65.9	5670	3010	3240	6200	2040
C674	CONTROL	60	M	129	3890	2580	2010	4290	884
M53C	CONTROL	53	M	46.6	3300	1810	2100	4720	1010
M61C	CONTROL	61	M	69.2	4270	2280	2100	3430	996
F42C	CONTROL	42	F	129	3950	1880	2720	5620	1340
F64M	CONTROL	64	F	111	7370	4260	5930	8740	2680
1A	CASE	49	M	118	5640	2910	3380	3700	1620
2A	CASE	83	M	200	5740	2660	4780	8090	1830
3A	CASE	55	F	142	4800	2840	2720	3360	1340
4A	CASE	50	F	184	5590	3480	3880	5690	2210
5A	CASE	57	F	157	4750	3520	4000	5880	1820
6A	CASE	44	M	153	8510	5590	5590	9430	2750
7A	CASE	45	M	326	3480	2120	3950	3360	1450
9A	CASE	45	F	46.7	4120	1660	2230	2930	976
10A	CASE	46	M	454	4330	1640	2460	3610	1290
11A	CASE	47	M	187	3940	1790	2890	4230	1420
12A	CASE	47	M	254	11500	5350	7700	7880	3360
13A	CASE	64	M	225	5760	2180	2930	4910	2690
14A	CASE	39	M	386	3540	2540	1980	3230	1000
15A	CASE	72	M	371	17600	8240	11200	19400	5030
16A	CASE	43	M	236	7100	4800	4270	5960	1960
17A	CASE	53	M	148	6060	4130	4410	4080	2150
18A	CASE	59	M	110	10900	4640	6860	8100	2880
19A	CASE	51	M	199	6490	3130	3800	5070	1920
20A	CASE	52	M	48.1	4840	2520	2410	3660	1280
21A	CASE	46	M	62.1	9510	3580	4840	6980	2350
22A	CASE	66	M	206	8200	3300	5160	6560	2400
23A	CASE	58	M	233	12200	6300	7340	13000	3160
24A	CASE	55	M	268	4830	2810	3360	6790	1740
25A	CASE	46	M	183	7670	3870	4360	7200	2610
26A	CASE	44	M	184	6510	3250	3120	3650	1280
27A	CASE	61	M	179	3790	1590	3350	3530	1930
28A	CASE	41	F	290	8090	4710	5140	6560	3030
29A	CASE	58	M	163	6570	3440	4840	8170	1920
30A	CASE	50	M	81.9	4250	2670	3090	4950	1410
31A	CASE	55	M	204	6850	3440	4790	9370	2000
32A	CASE	62	M	162	4260	2210	2980	4210	1430
33A	CASE	39	M	192	5110	3660	4650	3790	2410
34A	CASE	49	M	209	5910	3270	4200	8290	1950
35A	CASE	72	M	129	6070	3140	3670	5510	1590
36A	CASE	57	M	99.8	6470	2950	7620	9070	3260
O1	CASE	58	M	59.1	4660	2870	3880	9950	1910
O2	CASE	56	M	109	3920	2250	3160	6280	2070
O3	CASE	62	M	53.5	4030	2150	3290	8160	1400
O4	CASE	64	F	87.5	4460	2130	2420	3340	1140
O7	CASE	48	M	48.1	2620	1150	1890	3610	1160
E10	CASE	54	M	64.2	3860	1790	3450	6950	2230
E11	CASE	24	M	70.5	5100	2170	4730	5840	1750
E15	CASE	63	M	111	2860	1280	2190	5270	1390
E23	CASE	64	M	215	2760	1860	1830	3030	1200
E43	CASE	48	F	104	6240	3420	4260	9170	2370
E62	CASE	75	M	284	3210	1660	3820	8180	2010
E63	CASE	41	M	104	5310	2280	3740	9840	1840
QEH8	CASE	42	M	78.8	5470	2850	3700	6050	2360
QEH11	CASE	43	M	72.6	5620	3050	4770	9370	2550
