# Supplementary material for: Profiling lysophosphatidic acid levels in plasma from head and neck cancer patients
Source: PeerJ. 2020 Jun 5;8:e9304. doi: 10.7717/peerj.9304 (PMC7278886; doi:10.7717/peerj.9304)
Supplement: Data S2 [file peerj-08-9304-s003.xlsx]

## Sheet: OSCC_data_for_R_with_clinical
Sample ID	age	gender	LPA 16:0	LPA 18:0	LPA 18:1	LPA 18:2	LPA 20:4
N1 10X	63	Male	18700	20300	12900	17600	5390
N2 20X	46	Male	42800	37600	40000	21400	10260
N3 10X	49	Male	14100	12300	8670	13400	3130
N4 10X	63	Male	17000	20600	13300	10500	3930
N5 20X	50	Male	38600	45200	25200	20800	7280
N6 10X	62	Female	16400	19100	10800	13500	3640
N7 10X	50	Female	7960	10200	4040	4020	1330
N8 10X	60	Female	6860	8350	3100	2120	810
N9 10X	56	Male	15800	18000	9090	14400	3520
N10 10X	32	Female	12600	15300	11300	19500	4120
N11 10X	58	Female	9200	10300	7180	11800	2280
N12 10X	61	Female	12800	14000	5970	8400	1950
N13 10X	NA	n/k	13000	14600	11500	23000	4320
N14 10X	52	Male	12600	12300	9280	17100	3200
N15 10X	68	Male	9240	10700	6920	14700	2800
N16 10X	44	Female	12900	16800	9980	20400	3210
N17	42	Male	17980	15980	12380	21600	3660
N18	20	Male	12860	12500	10340	18280	2940
N19	21	Male	17060	14340	11560	20800	3940
N20	48	Female	16060	16100	9820	17660	2520
N21	21	Female	13500	17240	12100	24600	3000
N22	21	Female	11220	12360	8520	16060	2400
N23	21	Female	10740	11720	9900	23400	2920
N24	23	Female	12180	15320	7520	11100	2320
N25	24	Female	15220	18560	10540	23000	2720
N26	24	Female	13500	15240	10620	15240	3060
N27	23	Male	15520	13740	10700	17840	3380
N28	23	Male	15780	16100	14300	31800	5700
N29	25	Male	15740	18380	12720	29800	3760
N30	33	Female	13380	15080	11660	21000	4080
N31	22	Female	19240	18120	12880	22400	3840
N32	23	Male	16640	17300	11800	29400	3880
N33	24	Male	18840	18860	14780	36400	4240
N34	22	Female	14020	15620	9960	12200	2100
N35	23	Male	22200	20000	16760	39200	5540
N36	23	Female	17900	21200	10760	17080	3040
N37	23	Female	20200	17120	12260	26800	3240
N38	54	Male	17460	16920	11520	17700	3000
N39	81	Female	26600	23400	15760	17980	4520
N40	53	Male	16220	12180	11100	14280	2760
E1	63	Female	11520	15860	5960	5560	1522
E2	47	Male	7960	10060	5140	8740	1294
E3	62	Male	22000	22800	10580	12240	3080
E4	71	Female	17640	11600	8620	9320	2820
E5	52	Female	14540	19900	10720	22800	3820
E6	65	Female	23600	20600	14020	11960	3960
E7	48	Male	19020	22400	13060	12860	4180
E8	74	Female	7840	6760	4140	7200	792
E9	NA	n/k	10980	13120	4440	2440	722
E10	72	Female	9300	9140	5080	3980	1194
E11	58	Female	19040	19680	10580	12260	3020
E12	34	Male	16580	19980	7740	8620	2260
E13	36	Female	19780	21200	11920	17340	3300
E14	59	Male	11280	12540	4840	4840	1204
E15	59	Male	13040	13300	7440	9360	2080
E16	59	Female	15280	13660	7000	7780	1578
E17	58	Female	10880	13080	8440	7980	2240
E18	65	Female	12160	9440	6540	9280	1530
E19	64	Female	29200	34800	20400	20000	6140
E20	59	Female	9260	7280	7860	6400	1514
E21	73	Male	22800	21600	8140	4420	2700
E22	61	Female	12860	16360	9320	6960	1990
E23	81	Male	18020	16280	9040	10060	1970
E24	64	Female	20200	18720	10140	16500	2920
E25	65	Female	22800	21400	16240	11120	5300
E26	50	Male	19260	19860	6120	5160	2900
E27	72	Male	13540	10600	3840	4980	1476
E28	29	Female	12160	14580	5980	5320	3040
E29	63	Male	3360	2960	2340	3460	1306
E30	23	Female	4840	4180	4260	4440	2080
E31	71	Female	2040	1840	1124	2480	812
E32	57	Female	3080	3040	2660	3020	1118
E33	36	Male	12920	8960	4140	4280	1772
E34	38	Male	17900	19180	6660	6800	2800
E35	70	Male	21000	18420	16140	18720	5700
E36	70	Female	22800	18820	10060	10340	4480
E37	72	Male	28800	22800	15040	21400	5420
E38	56	Male	25000	19420	13180	27200	4920
E39	26	Female	17820	17400	9000	9280	4040
E40	44	Female	33600	26400	22800	29200	8120
AD1	75	Female	20200	12900	6640	8180	2660
AD2	71	Female	14320	11740	5240	5160	1908
AD3	52	Male	15760	11940	9140	5540	3980
AD4	35	Male	11480	10060	4860	6280	2480
AD5	63	Female	20200	17300	11100	12180	4760
AD6	NA	n/k	21400	16640	8840	8700	3160
AD7	75	Female	12020	8720	4660	5380	2220
AD8	49	Male	12120	9260	6700	8280	2660
AD9	61	Female	7120	6040	3500	4280	1454
AD10	42	Male	16740	15820	7880	6600	3040
AD11	61	Female	22400	17260	10940	16120	4300
AD12	29	Male	15140	17380	10960	12980	3540
AD13	44	Female	20800	16900	14160	17680	4540
AD14	71	Male	32200	23600	11740	6420	5160
AD15	66	Female	16360	18240	6740	6440	2940
AD16	20	Male	24600	18460	9020	7500	3020
AD17	66	Male	26600	20200	12600	13420	5620
AD18	59	Female	23400	22000	9660	12500	3320
AD19	53	Female	15280	12800	6300	7100	2720
AD20	62	Male	8820	6880	6540	16620	3080
AD21	65	Female	19000	15640	6860	7000	2840
AD22	60	Male	28800	28000	15200	15560	5220
AD23	37	Female	17180	14600	6340	6020	2240
AD24	86	Female	23200	21400	12080	17460	4100
AD25	79	Female	12720	10820	4120	4120	1986
AD26	48	Female	11180	8080	4960	7340	1970
AD27	35	Female	13320	12500	8400	10460	3100
AD28	66	Female	13000	10800	8120	12680	2760
AD29	55	Female	14620	13180	11380	26400	4840
AD30	53	Female	7880	6800	2840	5140	1392
AD31	57	Male	16720	15620	12300	16300	5060
AD32	56	Male	16300	14600	7700	10440	2640
AD33	52	Female	20400	19740	13700	13520	4460
AD34	77	Female	10220	7980	6880	8300	2460
AD35	49	Male	3940	3280	2480	4360	1626
AD36	51	Female	16180	13400	8220	8540	3140
AD37	67	Female	19760	14680	9380	9900	3140
AD38	48	Female	18540	15220	10160	8540	5300
AD39	54	Female	5800	5520	3440	5600	1852
AD40	59	Female	17360	12860	6500	6620	2980
