# Supplementary material for: Profiling lysophosphatidic acid levels in plasma from head and neck cancer patients
Source: PeerJ journal article supplement (doi:10.7717/peerj.9304), 2020-06-05
Supplement: Figure_S1.pdf [file Figure_S1.pdf]

**(A) 16:0 LPA**

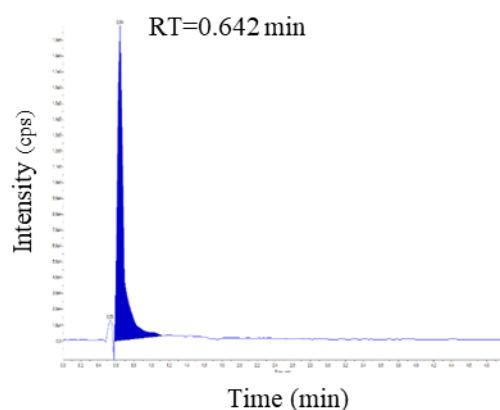

**(B) 17:0 LPA**

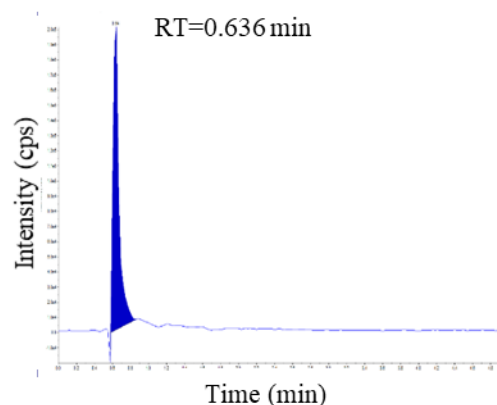

**(C) 18:0 LPA**

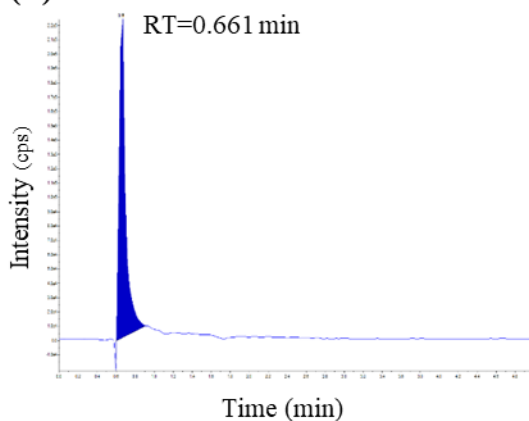

**(D) 18:1 LPA**

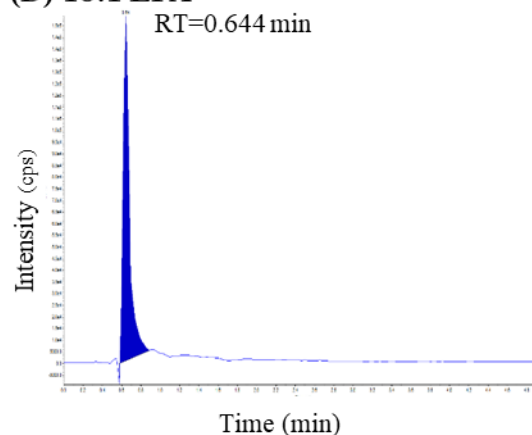

**(E) 18:2 LPA**

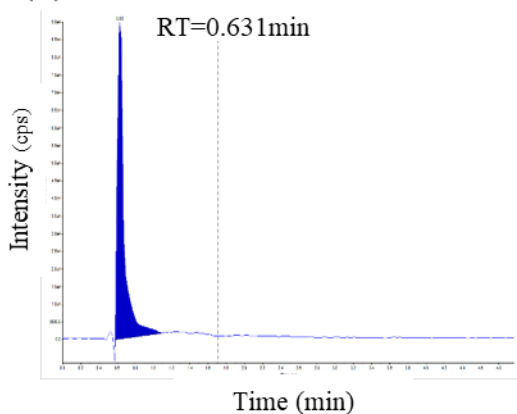

**(F) 20:4 LPA**

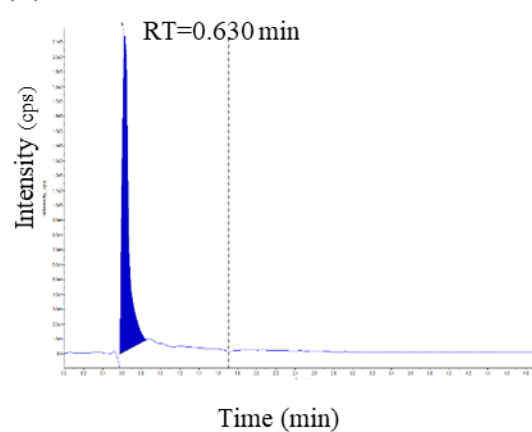

Individual retention times for each LPA are as follows: 16:0 LPA-0.642min, 17:0 LPA-0.636min, 18:0 LPA-0.661min, 18:1 LPA-0.644min, 18:2 LPA-0.631 and 20:4 LPA-0.630min. 17:0 LPA was the internal standard incorporated in all standard mixtures and samples for normalization of all runs. The overall run time for chromatography was 5 mins.
